# Supplementary material
Source: publisher figshare collection journal article supplement (https://acs.figshare.com/ndownloader/files/25784735)
Supplement: Supplementary file 1 [file 25784735]

# Supporting Information

## Carbon Dioxide Driven Coupling in a Two-Compartment System: Methyl Red Oscillator

*Norbert Németh<sup>1</sup>, Gábor Holló<sup>2</sup>, István Lagzi<sup>1,2\*</sup>*

<sup>1</sup>Department of Physics, Budapest University of Technology and Economics, H-1111 Budapest,  
Budafoki út 8, Hungary

<sup>2</sup>MTA-BME Condensed Matter Physics Research Group, Budapest University of Technology and  
Economics, H-1111 Budapest, Budafoki út 8, Hungary

## Kinetic model and its parameters (Supporting Tables S1-S5)

| no. | Reaction                                                                                                                           | Rate law                                                          | Rate constant                                                                                    |
|-----|------------------------------------------------------------------------------------------------------------------------------------|-------------------------------------------------------------------|--------------------------------------------------------------------------------------------------|
| R1  | $\text{SO}_3^{2-} + \text{H}^+ \rightleftharpoons \text{HSO}_3^-$                                                                  | $k_1[\text{SO}_3^{2-}][\text{H}^+] - k_{1r}[\text{HSO}_3^-]$      | $k_1 = 2 \times 10^{10} (\text{M s})^{-1}$<br>$k_{1r} = 2 \times 10^3 \text{ s}^{-1}$            |
| R2  | $\text{HSO}_3^- + \text{H}^+ \rightleftharpoons \text{H}_2\text{SO}_3$                                                             | $k_2[\text{HSO}_3^-][\text{H}^+] - k_{2r}[\text{H}_2\text{SO}_3]$ | $k_2 = 1.2 \times 10^{10} (\text{M s})^{-1}$<br>$k_{2r} = 2 \times 10^8 \text{ s}^{-1}$          |
| R3  | $3\text{HSO}_3^- + \text{BrO}_3^- \rightarrow 3\text{SO}_4^{2-} + \text{Br}^- + 3\text{H}^+$                                       | $k_3[\text{HSO}_3^-][\text{BrO}_3^-]$                             | $k_3 = 5.97 \times 10^{-2} (\text{M s})^{-1}$                                                    |
| R4  | $3\text{H}_2\text{SO}_3 + \text{BrO}_3^- \rightarrow 3\text{SO}_4^{2-} + \text{Br}^- + 6\text{H}^+$                                | $k_4[\text{H}_2\text{SO}_3][\text{BrO}_3^-]$                      | $k_4 = 2.2 \times 10^1 (\text{M s})^{-1}$                                                        |
| R5  | $\text{SO}_4^{2-} + \text{H}^+ \rightleftharpoons \text{HSO}_4^-$                                                                  | $k_5[\text{SO}_4^{2-}][\text{H}^+] - k_{5r}[\text{HSO}_4^-]$      | $k_5 = 10^{11} (\text{M s})^{-1}$<br>$k_{5r} = 1 \times 10^9 \text{ s}^{-1}$                     |
| R6  | $6\text{H}_2\text{SO}_3 + \text{BrO}_3^- \rightarrow 3\text{S}_2\text{O}_6^{2-} + \text{Br}^- + 3\text{H}_2\text{O} + 6\text{H}^+$ | $k_6[\text{H}_2\text{SO}_3][\text{BrO}_3^-]$                      | $k_6 = 2 (\text{M s})^{-1}$                                                                      |
| R7  | $\text{H}_2\text{O} \rightleftharpoons \text{H}^+ + \text{OH}^-$                                                                   | $k_7 - k_{7r}[\text{H}^+][\text{OH}^-]$                           | $k_7 = 1 \times 10^{-3} \text{ M s}^{-1}$<br>$k_{7r} = 1 \times 10^{11} (\text{M s})^{-1}$       |
| R8  | $\text{CO}_3^{2-} + \text{H}^+ \rightleftharpoons \text{HCO}_3^-$                                                                  | $k_8[\text{H}^+][\text{CO}_3^{2-}] - k_{8r}[\text{HCO}_3^-]$      | $k_8 = 1 \times 10^{11} (\text{M s})^{-1}$<br>$k_{8r} = 4.8 \text{ s}^{-1}$                      |
| R9  | $\text{HCO}_3^- + \text{H}^+ \rightleftharpoons \text{H}_2\text{CO}_3$                                                             | $k_9[\text{H}^+][\text{HCO}_3^-] - k_{9r}[\text{H}_2\text{CO}_3]$ | $k_9 = 5 \times 10^{10} (\text{M s})^{-1}$<br>$k_{9r} = 8.6 \times 10^6 \text{ s}^{-1}$          |
| R10 | $\text{H}_2\text{CO}_3 \rightleftharpoons \text{CO}_2(\text{aq}) + \text{H}_2\text{O}$                                             | $k_{10}[\text{H}_2\text{CO}_3] - k_{10r}[\text{CO}_2(\text{aq})]$ | $k_{10} = 1.65 \times 10^1 \text{ s}^{-1}$<br>$k_{10r} = 4.3 \times 10^{-2} \text{ s}^{-1}$      |
| R11 | $\text{CO}_2(\text{aq}) \rightleftharpoons \text{CO}_2(\text{gas})$                                                                | $k_{11}([\text{CO}_2(\text{aq})] - [\text{CO}_2(\text{gas})])$    | $k_{11} = 10^{-4} \text{ s}^{-1}$<br>$[\text{CO}_2(\text{gas})] = 1.32 \times 10^{-5} \text{ M}$ |

**Table S1** Chemical reactions, rate laws and rate constants used in the model of the sulfite-bromate pH oscillator (driving system). The rate constants were adopted from Supporting Ref. 1.

| Chemical species            | Feed concentration, $c_{0i}^{\text{CSTR}}$ (M) | Initial concentration, $c_i^{\text{CSTR}}(t = 0)$ (M) |
|-----------------------------|------------------------------------------------|-------------------------------------------------------|
| $\text{SO}_3^{2-}$          | $6.4 \times 10^{-2}$                           | $6.4 \times 10^{-2}$                                  |
| $\text{H}^+$                | $3.19 \times 10^{-3}$                          | $3.19 \times 10^{-3}$                                 |
| $\text{BrO}_3^-$            | $10^{-1}$                                      | $10^{-1}$                                             |
| $\text{HSO}_4^-$            | $3.19 \times 10^{-3}$                          | $3.19 \times 10^{-3}$                                 |
| $\text{HCO}_3^-$            | $2.1 \times 10^{-3}$                           | $2.1 \times 10^{-3}$                                  |
| $\text{CO}_2(\text{g})$     | $1.32 \times 10^{-5}$                          | $1.32 \times 10^{-5}$                                 |
| $\text{HSO}_3^-$            | 0                                              | 0                                                     |
| $\text{H}_2\text{SO}_3$     | 0                                              | 0                                                     |
| $\text{SO}_4^{2-}$          | 0                                              | 0                                                     |
| $\text{Br}^-$               | 0                                              | 0                                                     |
| $\text{S}_2\text{O}_6^{2-}$ | 0                                              | 0                                                     |
| $\text{OH}^-$               | 0                                              | 0                                                     |
| $\text{CO}_3^{2-}$          | 0                                              | 0                                                     |
| $\text{H}_2\text{CO}_3$     | 0                                              | 0                                                     |
| $\text{CO}_2(\text{aq})$    | 0                                              | 0                                                     |

**Table S2** Chemical species and their initial and feed concentrations in the sulfite-bromate pH oscillator (driving system). For all species  $\kappa_i^{\text{CSTR}} = 4.3288 \times 10^{-4} \text{ s}^{-1}$  was used.

|    |                                                                                        |                                                                   |                                                                                            |
|----|----------------------------------------------------------------------------------------|-------------------------------------------------------------------|--------------------------------------------------------------------------------------------|
| R1 | $\text{H}_2\text{O} \rightleftharpoons \text{H}^+ + \text{OH}^-$                       | $k_1 - k_{1r}[\text{H}^+][\text{OH}^-]$                           | $k_1 = 1 \times 10^{-3} \text{ M s}^{-1}$<br>$k_{1r} = 1 \times 10^{11} (\text{M s})^{-1}$ |
| R2 | $\text{CO}_3^{2-} + \text{H}^+ \rightleftharpoons \text{HCO}_3^-$                      | $k_2[\text{H}^+][\text{CO}_3^{2-}] - k_{2r}[\text{HCO}_3^-]$      | $k_2 = 1 \times 10^{11} (\text{M s})^{-1}$<br>$k_{2r} = 4.8 \text{ s}^{-1}$                |
| R3 | $\text{HCO}_3^- + \text{H}^+ \rightleftharpoons \text{H}_2\text{CO}_3$                 | $k_3[\text{H}^+][\text{HCO}_3^-] - k_{3r}[\text{H}_2\text{CO}_3]$ | $k_3 = 5 \times 10^{10} (\text{M s})^{-1}$<br>$k_{3r} = 8.6 \times 10^6 \text{ s}^{-1}$    |
| R4 | $\text{H}_2\text{CO}_3 \rightleftharpoons \text{CO}_2(\text{aq}) + \text{H}_2\text{O}$ | $k_4[\text{H}_2\text{CO}_3] - k_{4r}[\text{CO}_2(\text{aq})]$     | $k_4 = 1.65 \times 10^1 \text{ s}^{-1}$<br>$k_{4r} = 4.3 \times 10^{-2} \text{ s}^{-1}$    |
| R5 | $\text{HMR} \rightleftharpoons \text{H}^+ + \text{MR}^-$                               | $k_5[\text{HMR}] - k_{5r}[\text{H}^+][\text{MR}^-]$               | $k_5 = 10^{-4.95} \times 10^{10} \text{ s}^{-1}$<br>$k_{5r} = 10^{10} (\text{M s})^{-1}$   |
| R6 | $\text{HMR} \rightarrow \text{HMR} \text{ (in silicone)}$                              | $k_6[\text{HMR}]$                                                 | $k_6 = 10^{-2} \text{ s}^{-1}$                                                             |

**Table S3** Chemical reactions, rate laws and rate constants used in the MR system. Reaction R5 describes the dissolution of the protonated form of MR in the silicone tube.  $k_6$  is the fine-tuned parameters in the model.

| Chemical species         | Feed concentration, $c_{0i}^{\text{CSTR}}$ (M) | Initial concentration, $c_i^{\text{CSTR}}(t = 0)$ (M) |
|--------------------------|------------------------------------------------|-------------------------------------------------------|
| $\text{H}^+$             | $10^{-7}$                                      | $10^{-7}$                                             |
| $\text{HCO}_3^-$         | 0                                              | 0                                                     |
| $\text{CO}_2(\text{g})$  | $1.32 \times 10^{-5}$                          | $1.32 \times 10^{-5}$                                 |
| $\text{OH}^-$            | $10^{-7}$                                      | $10^{-7}$                                             |
| $\text{CO}_3^{2-}$       | 0                                              | 0                                                     |
| $\text{H}_2\text{CO}_3$  | 0                                              | 0                                                     |
| $\text{CO}_2(\text{aq})$ | 0                                              | 0                                                     |
| HMR                      | 0                                              | 0                                                     |
| $\text{MR}^-$            | $3 \times 10^{-5}$                             | $3 \times 10^{-5}$                                    |

**Table S4** Chemical species and their initial and feed concentrations in the MR system. For all species

$\kappa_i^{\text{tube}} = 8.10784 \times 10^{-3} \text{ s}^{-1}$  was used.

|    |                                                                                   |                                                                          |                                |
|----|-----------------------------------------------------------------------------------|--------------------------------------------------------------------------|--------------------------------|
| R1 | $\text{CO}_2 (\text{aq, osc}) \rightleftharpoons n \text{CO}_2 (\text{aq, tube})$ | $k_t ([\text{CO}_2 (\text{aq, osc})] - [\text{CO}_2 (\text{aq, tube})])$ | $k_t = 10^{-2} \text{ s}^{-1}$ |
|----|-----------------------------------------------------------------------------------|--------------------------------------------------------------------------|--------------------------------|

**Table S5** Exchange/coupling of  $\text{CO}_2$  between the driving pH oscillator and methyl red solution, where  $n$  is the ratio of the volumes of the pH oscillator and MR solution in the silicone tube (22 mL/1.7 mL).  $k_t$  is the transfer rate constant (fine-tuned) for carbon dioxide from the pH oscillator to the MR solution.

## Supporting Figures (Figure S1-S3)

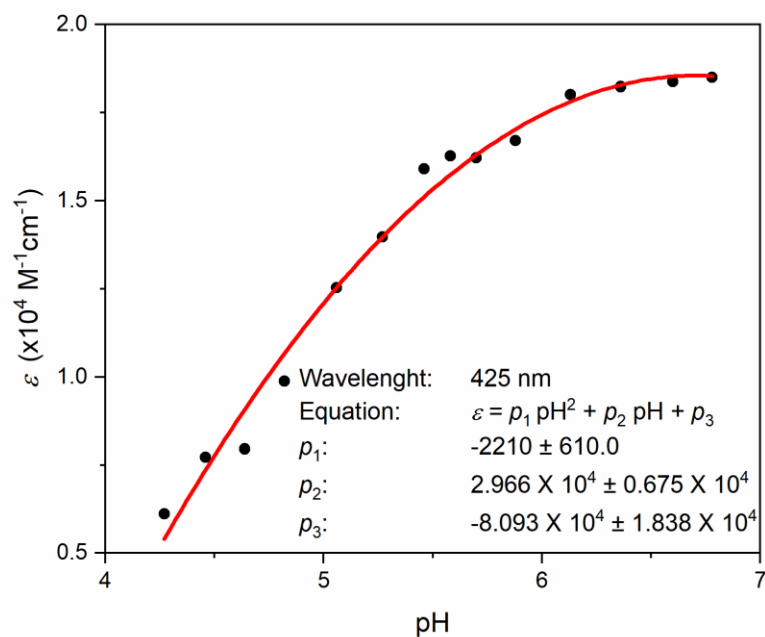

**Figure S1** Dependence of the molar absorption coefficient on the pH at  $\lambda = 425$  nm used in the numerical simulations to calculate the absorbance of the methyl red from its calculated concentration. Solid dots represent data obtained from the experimental measurements.

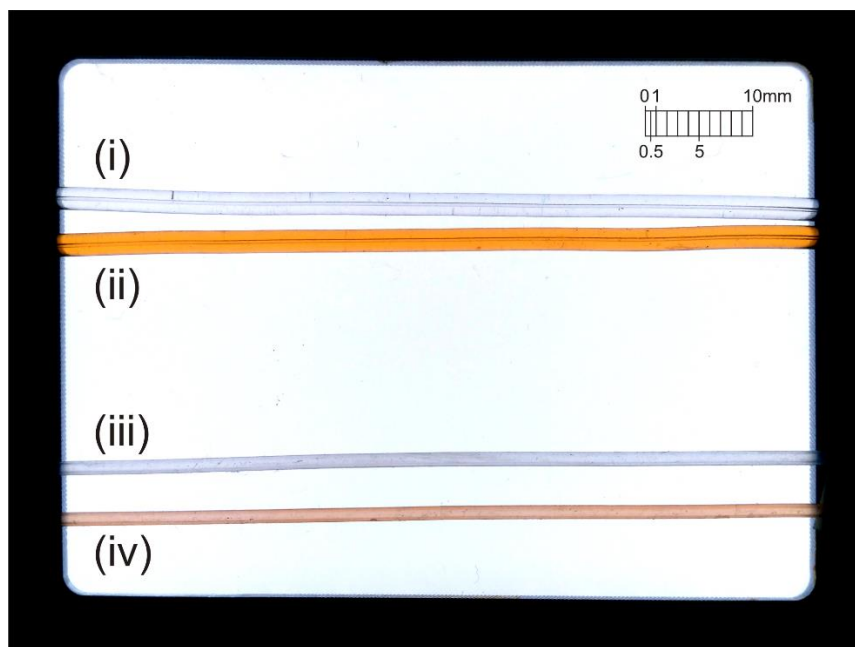

**Figure S2** Tygon and silicone tubes used in the experiments: (i), (iii) before and (ii), (iv) after the experiments. The color of the tubes originates from the penetrated methyl red dye.

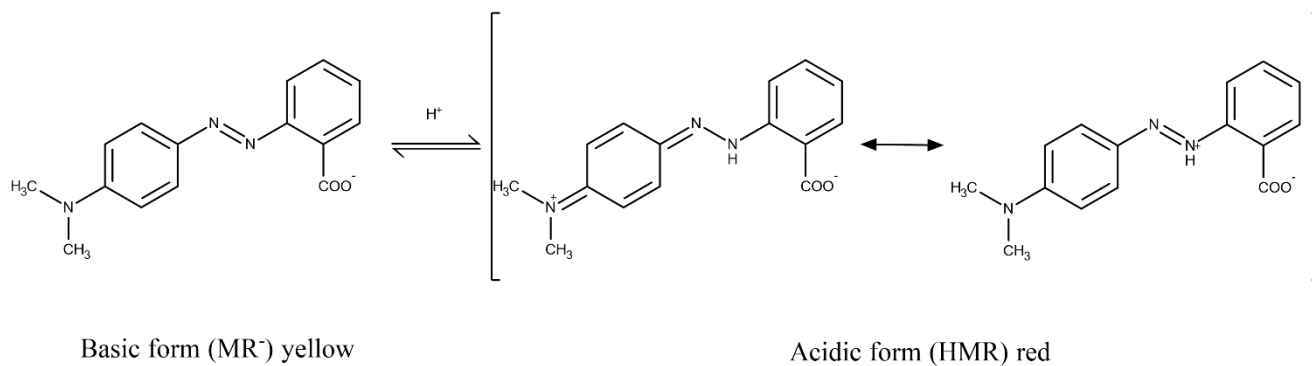

**Figure S3** Molecular structures of the protonated and deprotonated forms of the methyl red molecule.

## Supporting References

- (1) Holló, G.; Lagzi, I. Autonomous Chemical Modulation and Unidirectional Coupling in Two Oscillatory Chemical Systems. *J. Phys. Chem. A* **2019**, *123*, 1498–1504.
